# Supplementary material
Source: PubMed Central journal article supplement (PMC10991513)
Supplement: 262_2023_3494_MOESM1_ESM.pdf [file 262_2023_3494_MOESM1_ESM.pdf]

**Supplementary Table 1. Median time to progression in different cancer types stratified by receipt of radiotherapy preceding immune checkpoint inhibitor treatment and occurrence of immune-related adverse events.**

| Cancer type                | Median time to progression, months |            |            |          | p (log rank) |
|----------------------------|------------------------------------|------------|------------|----------|--------------|
|                            | no RT, no AE                       | RT+, no AE | no RT, AE+ | RT+, AE+ |              |
| Cutaneous melanoma         | 6.0                                | 3.0        | 14.0       | 20.0     | 0.001        |
| Non-small-cell lung cancer | 4.0                                | 3.0        | 5.0        | 10.0     | 0.015        |
| Renal cell carcinoma       | 3.0                                | 2.0        | 3.0        | 5.0      | 0.142        |
| Other cancers              | 6.0                                | 2.0        | 8.0        | 5.0      | 0.570        |

RT, radiotherapy preceding immune checkpoint inhibitor treatment; AE, immune-related adverse event.

**Supplementary Figure 1a-d. Time to progression by cancer type, stratified by receipt of radiotherapy preceding immune checkpoint inhibitor treatment and occurrence of immune-related adverse events.**

- a. Cutaneous melanoma.

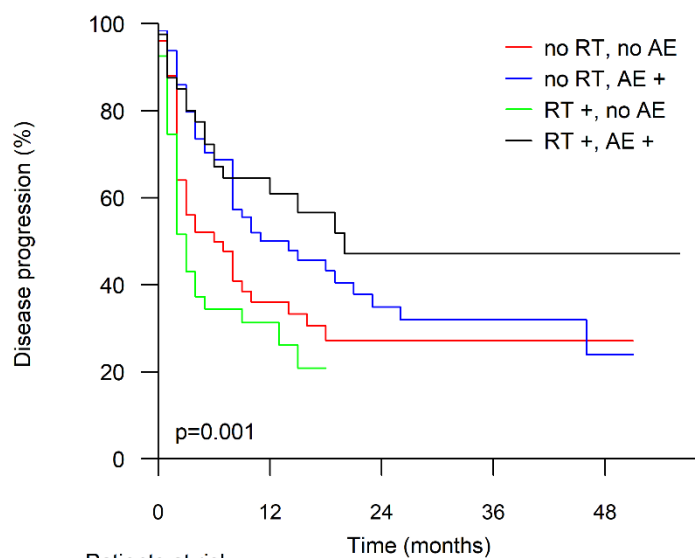

|              | Patients at risk |    |    |    |    |
|--------------|------------------|----|----|----|----|
|              | 0                | 12 | 24 | 36 | 48 |
| no RT, no AE | 50               | 15 | 6  | 2  | 1  |
| no RT, AE +  | 64               | 24 | 12 | 7  | 3  |
| RT +, no AE  | 40               | 6  | 0  | 0  | 0  |
| RT +, AE +   | 40               | 18 | 8  | 5  | 1  |

RT, radiotherapy preceding immune checkpoint inhibitor treatment; AE= immune-related adverse event.

b. Non-small-cell lung cancer.

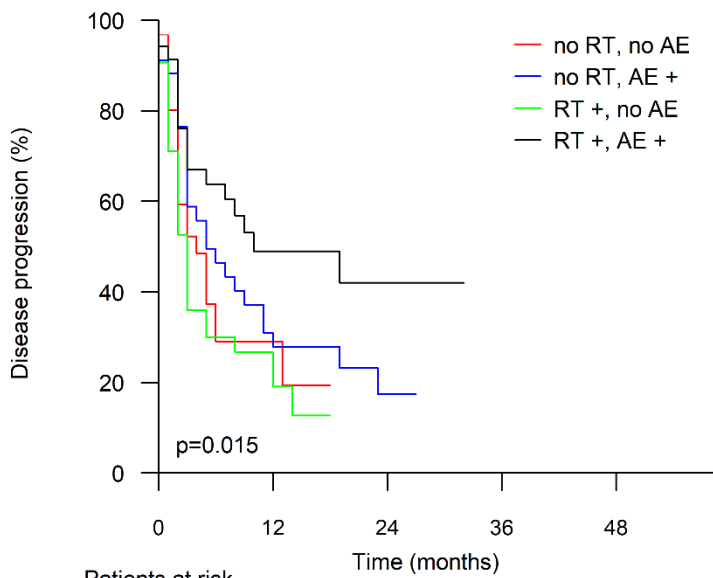

|              | Patients at risk |    |    |    |    |
|--------------|------------------|----|----|----|----|
|              | 0                | 12 | 24 | 36 | 48 |
| no RT, no AE | 32               | 5  | 0  | 0  | 0  |
| no RT, AE +  | 34               | 10 | 3  | 0  | 0  |
| RT +, no AE  | 43               | 7  | 0  | 0  | 0  |
| RT +, AE +   | 35               | 10 | 5  | 0  | 0  |

c. Renal cell carcinoma.

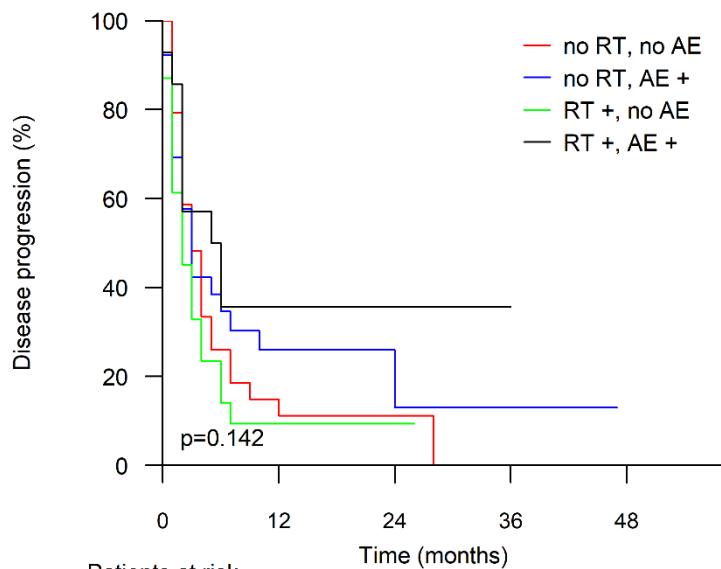

|              | Patients at risk |    |    |    |    |
|--------------|------------------|----|----|----|----|
|              | 0                | 12 | 24 | 36 | 48 |
| no RT, no AE | 30               | 4  | 1  | 0  | 0  |
| no RT, AE +  | 26               | 6  | 2  | 1  | 0  |
| RT +, no AE  | 31               | 2  | 1  | 0  | 0  |
| RT +, AE +   | 14               | 3  | 2  | 1  | 0  |

d. Other cancers.

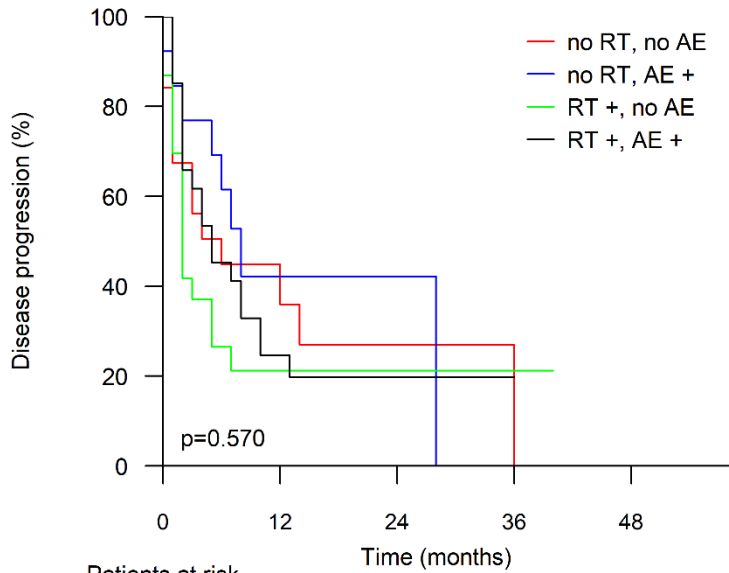

|              | Patients at risk |    |    |    |    |
|--------------|------------------|----|----|----|----|
|              | 0                | 12 | 24 | 36 | 48 |
| no RT, no AE | 19               | 5  | 2  | 1  | 0  |
| no RT, AE +  | 13               | 1  | 1  | 0  | 0  |
| RT +, no AE  | 23               | 2  | 2  | 1  | 0  |
| RT +, AE +   | 27               | 5  | 2  | 1  | 0  |

**Supplementary Figure 2a. Effect of immune-related adverse event severity on time to progression (log rank  $p=0.119$ ). 2b. Time to progression stratified by receipt of radiotherapy and occurrence of grade I-II immune-related adverse events (log rank  $p<0.001$ ).**

a.

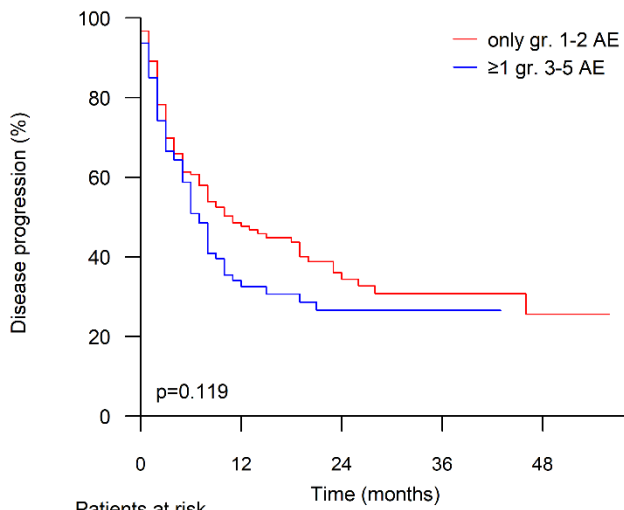

|                 | Patients at risk |    |    |    |    |
|-----------------|------------------|----|----|----|----|
|                 | 0                | 12 | 24 | 36 | 48 |
| only gr. 1-2 AE | 157              | 54 | 22 | 9  | 4  |
| ≥1 gr. 3-5 AE   | 94               | 23 | 13 | 6  | 0  |

b.

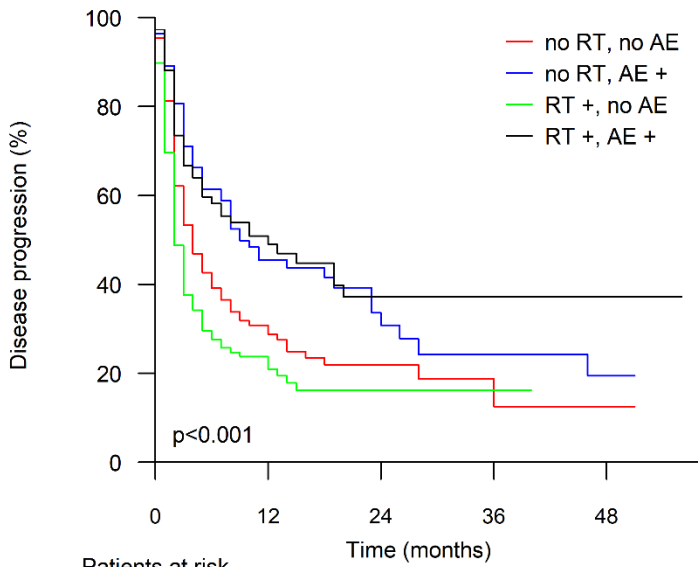

|              | Patients at risk |    |    |    |    |
|--------------|------------------|----|----|----|----|
|              | 0                | 12 | 24 | 36 | 48 |
| no RT, no AE | 131              | 29 | 9  | 3  | 1  |
| no RT, AE +  | 83               | 27 | 12 | 5  | 3  |
| RT +, no AE  | 137              | 17 | 3  | 1  | 0  |
| RT +, AE +   | 76               | 27 | 10 | 4  | 1  |

**Supplementary Figure 3. Time to progression stratified by radiotherapy timing (log rank  $p < 0.001$ ).**

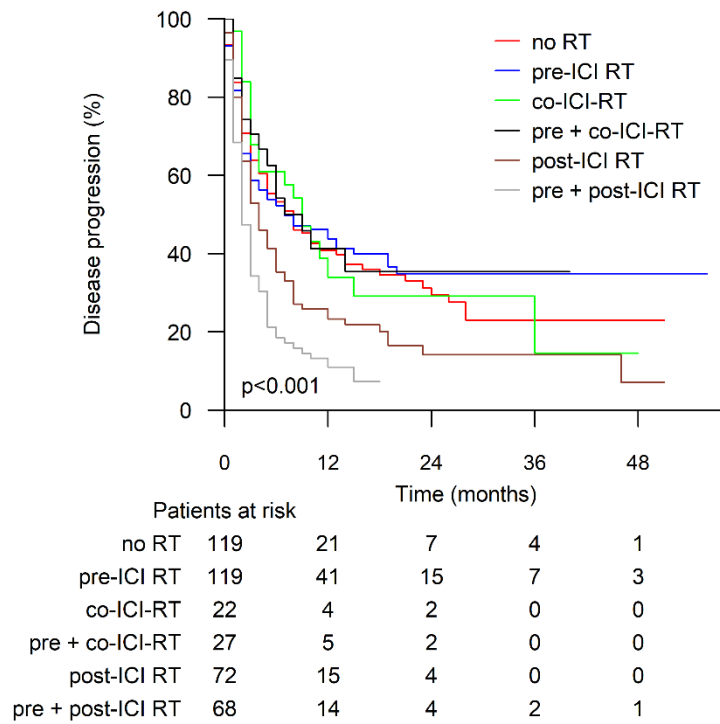

RT, radiotherapy; pre-ICI, preceding immune checkpoint inhibitor treatment start; co-ICI, concomitantly with ICI; post-ICI, after ICI treatment discontinuation.
